# Supplementary material for: The Microbiota Promotes Arterial Thrombosis in Low-Density Lipoprotein Receptor-Deficient Mice
Source: PubMed Central journal article supplement (PMC6805995; doi:10.1128/mbio.02298-19), 2019-10-22
Supplement: mBio.02298-19-sf002.pdf [file mBio.02298-19-sf002.pdf]

# Suppl. Figure 2

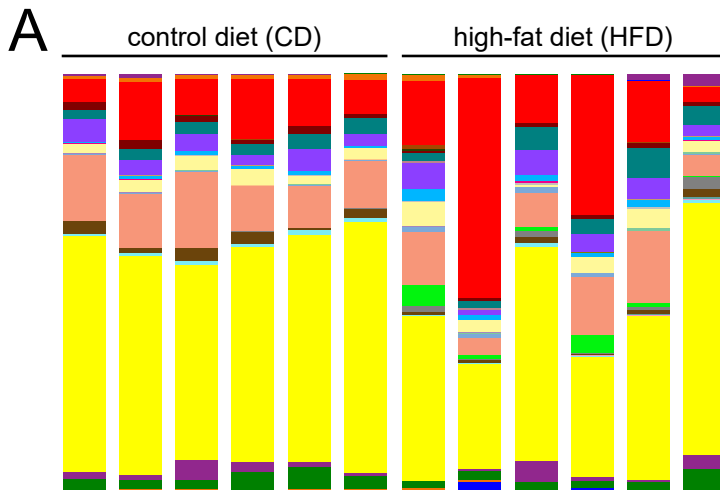

- Unassigned
- Actinobacteria;c\_Coriobacteriia;o\_Coriobacteriales;f\_Coriobacteriaceae
- Actinobacteria;c\_Coriobacteriia;o\_Coriobacteriales;f\_Coriobacteriaceae;g\_Adlercreutzia
- Bacteroidetes;c\_Bacteroidia;o\_Bacteroidales;f\_Bacteroidaceae;g\_Bacteroides
- Bacteroidetes;c\_Bacteroidia;o\_Bacteroidales;f\_Rikenellaceae
- Bacteroidetes;c\_Bacteroidia;o\_Bacteroidales;f\_S24-7
- Bacteroidetes;c\_Bacteroidia;o\_Bacteroidales;f\_[Odoribacteraceae];g\_Odoribacter
- Firmicutes
- Firmicutes;c\_Bacilli;o\_Bacillales;f\_Staphylococcaceae;g\_Staphylococcus
- Firmicutes;c\_Bacilli;o\_Lactobacillales;f\_Lactobacillaceae;g\_Lactobacillus
- Firmicutes;c\_Bacilli;o\_Lactobacillales;f\_Streptococcaceae;g\_Streptococcus
- Firmicutes;c\_Clostridia;o\_Clostridiales;f\_sp
- Firmicutes;c\_Clostridia;o\_Clostridiales
- Firmicutes;c\_Clostridia;o\_Clostridiales;f\_Clostridiaceae
- Firmicutes;c\_Clostridia;o\_Clostridiales;f\_Clostridiaceae;g\_Clostridium
- Firmicutes;c\_Clostridia;o\_Clostridiales;f\_Clostridiaceae;g\_Dehalobacterium
- Firmicutes;c\_Clostridia;o\_Clostridiales;f\_Lachnospiraceae
- Firmicutes;c\_Clostridia;o\_Clostridiales;f\_Lachnospiraceae;g\_Coproccoccus
- Firmicutes;c\_Clostridia;o\_Clostridiales;f\_Lachnospiraceae;g\_Dorea
- Firmicutes;c\_Clostridia;o\_Clostridiales;f\_Lachnospiraceae;g\_[Ruminococcus]
- Firmicutes;c\_Clostridia;o\_Clostridiales;f\_Peptococcaceae
- Firmicutes;c\_Clostridia;o\_Clostridiales;f\_Peptostreptococcaceae
- Firmicutes;c\_Clostridia;o\_Clostridiales;f\_Ruminococcaceae
- Firmicutes;c\_Clostridia;o\_Clostridiales;f\_Ruminococcaceae;g\_Anaerotruncus
- Firmicutes;c\_Clostridia;o\_Clostridiales;f\_Ruminococcaceae;g\_Oscillospira
- Firmicutes;c\_Clostridia;o\_Clostridiales;f\_Ruminococcaceae;g\_Ruminococcus
- Firmicutes;c\_Clostridia;o\_Clostridiales;f\_[Mogibacteriaceae]
- Firmicutes;c\_Erysipelotrichi;o\_Erysipelotrichales;f\_Erysipelotrichaceae
- Firmicutes;c\_Erysipelotrichi;o\_Erysipelotrichales;f\_Erysipelotrichaceae;g\_Allobaculum
- Firmicutes;c\_Erysipelotrichi;o\_Erysipelotrichales;f\_Erysipelotrichaceae;g\_Clostridium
- Proteobacteria;c\_Betaproteobacteria;o\_Burkholderiales;f\_Alcaligenaceae;g\_Sutterella
- Proteobacteria;c\_Deltaproteobacteria;o\_Desulfovibrionales;f\_Desulfovibrionaceae;g\_Desulfovibrio
- Tenericutes;c\_Mollicutes;o\_RF39
