# Supplementary material for: The Microbiota Promotes Arterial Thrombosis in Low-Density Lipoprotein Receptor-Deficient Mice
Source: PubMed Central journal article supplement (PMC6805995; doi:10.1128/mbio.02298-19), 2019-10-22

# Suppl. Figure 4

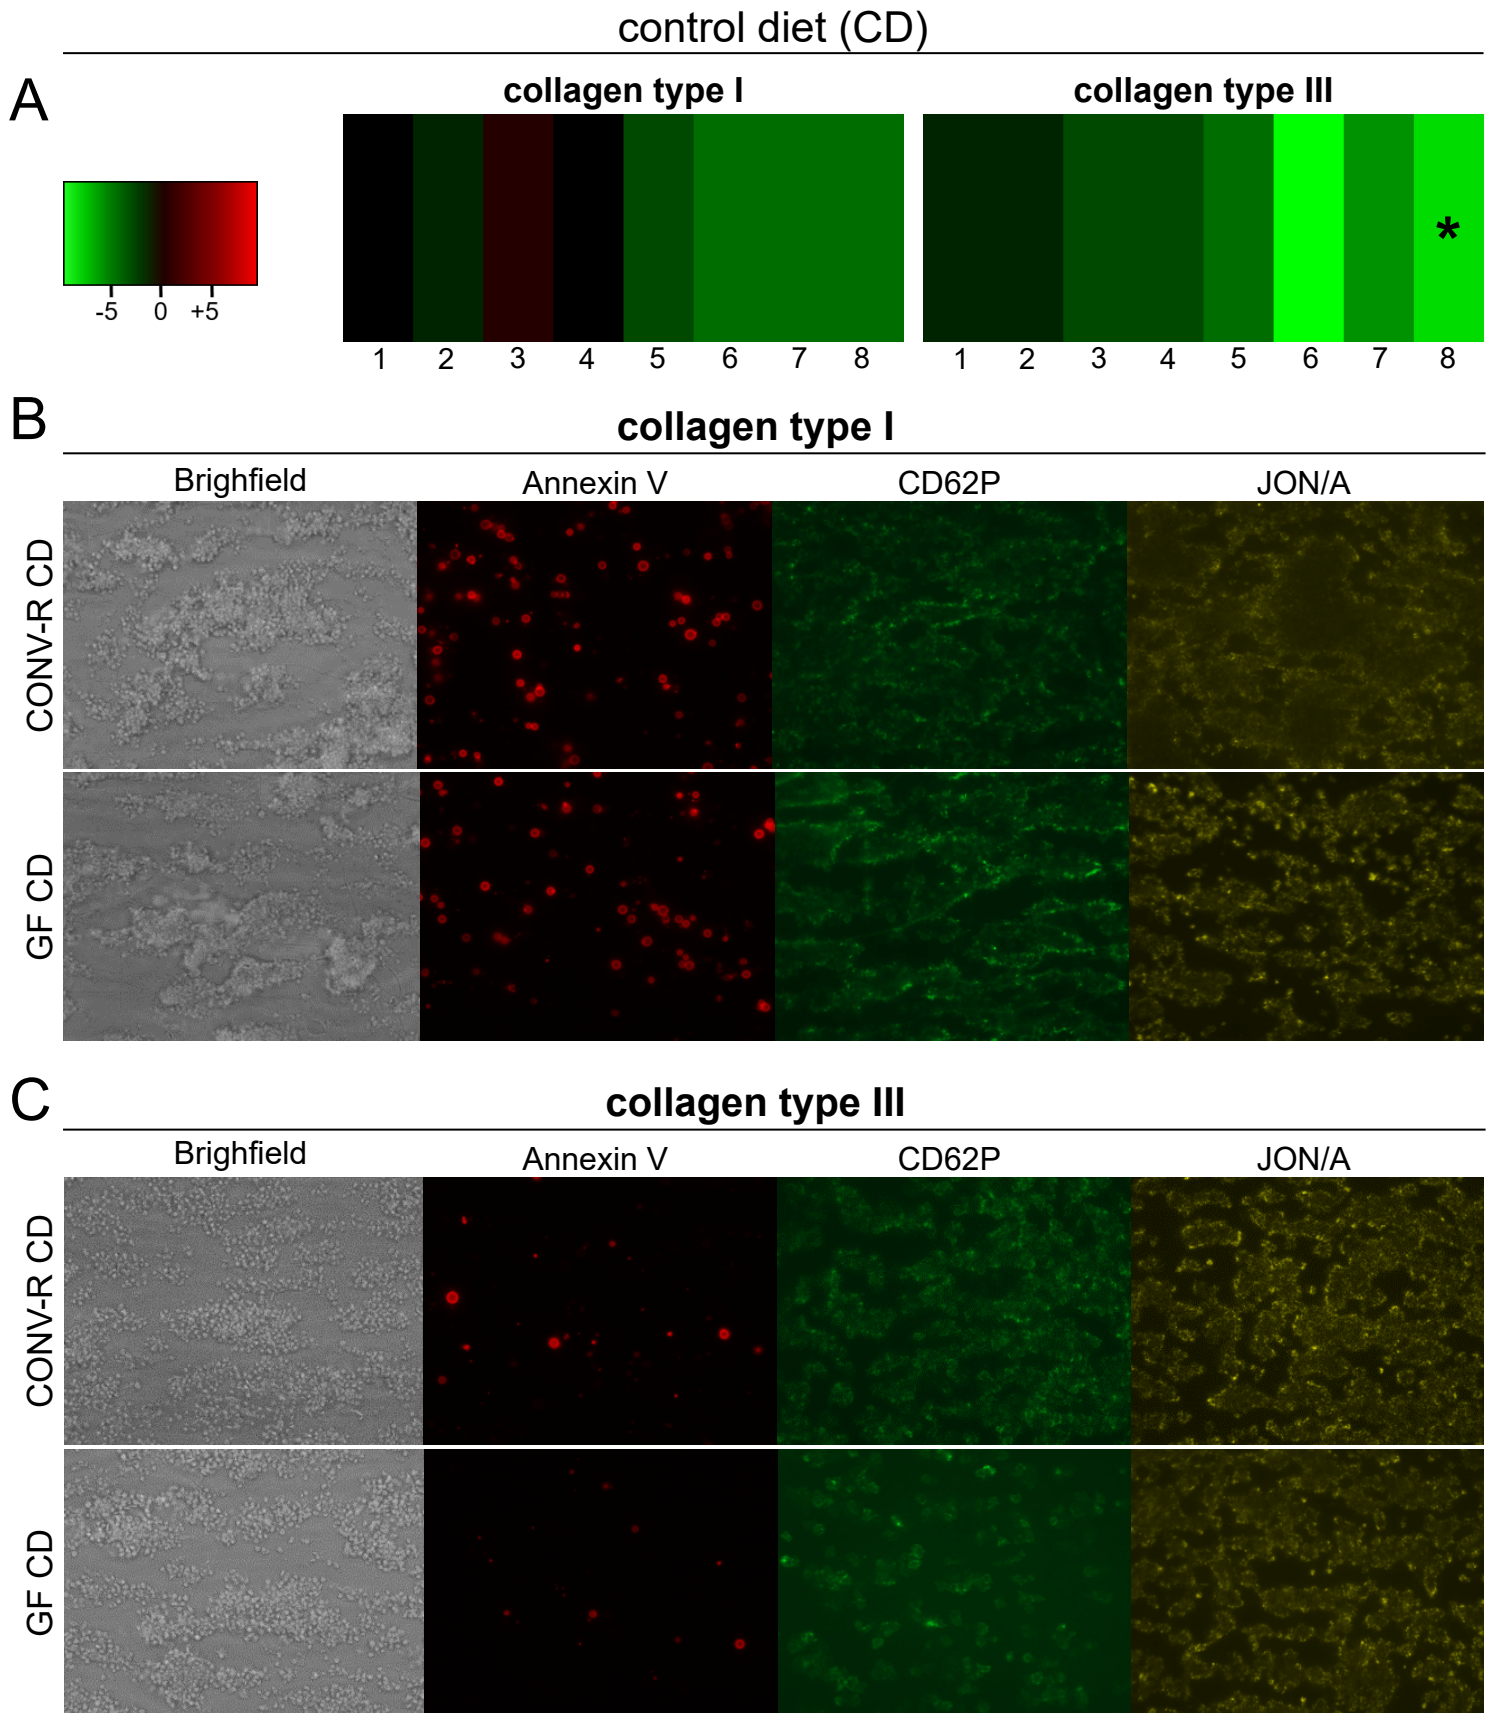

Supplement: mBio.02298-19-sf004.pdf [file mBio.02298-19-sf004.pdf]
