# Supplementary material for: The Microbiota Promotes Arterial Thrombosis in Low-Density Lipoprotein Receptor-Deficient Mice
Source: PubMed Central journal article supplement (PMC6805995; doi:10.1128/mbio.02298-19), 2019-10-22
Supplement: mBio.02298-19-st001.pdf [file mBio.02298-19-st001.pdf]

| <b>Taxon</b>                                                                                                   | <b>Group</b> | <b>LDA score (log10)</b> | <b>p</b>   |
|----------------------------------------------------------------------------------------------------------------|--------------|--------------------------|------------|
| Bacteria.Firmicutes. <b>Clostridia</b>                                                                         | HFD          | 5.12685705               | 0.00394775 |
| Bacteria.Firmicutes.Clostridia.Clostridiales.Clostridiaceae. <b>unknown_spec_</b>                              | HFD          | 4.6825023                | 0.002093   |
| Bacteria.Firmicutes.Clostridia.Clostridiales. <b>Clostridiaceae</b>                                            | HFD          | 4.66351586               | 0.00394775 |
| Bacteria.Firmicutes.Clostridia.Clostridiales.Ruminococcaceae. <b>Anaerotruncus_spec_</b>                       | HFD          | 4.44262181               | 0.0131951  |
| Bacteria.Firmicutes.Bacilli.Bacillales.Staphylococcaceae. <b>Staphylococcus_spec_</b>                          | HFD          | 4.43452227               | 0.00280167 |
| Bacteria.Firmicutes.Bacilli.Bacillales. <b>Staphylococcaceae</b>                                               | HFD          | 4.43451631               | 0.00280167 |
| Bacteria.Firmicutes.Bacilli. <b>Bacillales</b>                                                                 | HFD          | 4.43444953               | 0.00280167 |
| Bacteria.Firmicutes.Clostridia.Clostridiales._Mogibacteriaceae_. <b>unknown_spec_</b>                          | HFD          | 4.29851849               | 0.00394775 |
| Bacteria.Firmicutes.Clostridia.Clostridiales._ <b>Mogibacteriaceae</b>                                         | HFD          | 4.29851849               | 0.00394775 |
| Bacteria.Firmicutes.Clostridia.Clostridiales.Lachnospiraceae._ <b>Ruminococcus_gnavus</b>                      | HFD          | 4.27620646               | 0.03704073 |
| Bacteria.Proteobacteria.Deltaproteobacteria. <b>Desulfovibrionales</b>                                         | HFD          | 4.12798083               | 0.00394775 |
| Bacteria.Proteobacteria. <b>Deltaproteobacteria</b>                                                            | HFD          | 4.12798083               | 0.00394775 |
| Bacteria.Proteobacteria.Deltaproteobacteria.Desulfovibrionales. <b>Desulfovibrionaceae</b>                     | HFD          | 4.12798083               | 0.00394775 |
| Bacteria.Proteobacteria.Deltaproteobacteria.Desulfovibrionales.Desulfovibrionaceae. <b>Desulfovibrio_spec_</b> | HFD          | 4.12798083               | 0.00394775 |
| Bacteria.Firmicutes.Clostridia.Clostridiales.Lachnospiraceae. <b>unknown_spec_</b>                             | HFD          | 4.11639352               | 0.00739713 |
| Bacteria.Firmicutes.Erysipelotrichi.Erysipelotrichales.Erysipelotrichaceae. <b>Allobaculum_spec_</b>           | HFD          | 4.05499724               | 0.01556764 |
| Bacteria.Firmicutes.Bacilli.Lactobacillales. <b>Streptococcaceae</b>                                           | HFD          | 3.98462481               | 0.00388491 |
| Bacteria.Firmicutes.Bacilli.Lactobacillales.Streptococcaceae. <b>Streptococcus_spec_</b>                       | HFD          | 3.98462481               | 0.00388491 |
| Bacteria.Firmicutes.Clostridia.Clostridiales. <b>Peptostreptococcaceae</b>                                     | HFD          | 3.88191846               | 0.00739713 |
| Bacteria.Firmicutes.Clostridia.Clostridiales.Peptostreptococcaceae. <b>unknown_spec_</b>                       | HFD          | 3.88191841               | 0.00739713 |
| Bacteria.Firmicutes.Clostridia.Clostridiales. <b>Lachnospiraceae</b>                                           | HFD          | 3.86242255               | 0.02776836 |
| Bacteria.Firmicutes.Clostridia. <b>Clostridiales</b>                                                           | HFD          | 3.81337633               | 0.00739713 |
| Bacteria.Firmicutes.Erysipelotrichi.Erysipelotrichales.Erysipelotrichaceae. <b>unknown_spec_</b>               | CD           | -3.9437408               | 0.00739713 |
| Bacteria.Actinobacteria.Coriobacteriia.Coriobacteriales.Coriobacteriaceae. <b>Adlercreutzia_spec_</b>          | CD           | -3.9779805               | 0.002093   |
| Bacteria.Firmicutes.Clostridia.Clostridiales.Ruminococcaceae. <b>Oscillospira_spec_</b>                        | CD           | -4.1630114               | 0.00334562 |

|                                                                                                  |           |            |            |
|--------------------------------------------------------------------------------------------------|-----------|------------|------------|
| Bacteria.Firmicutes.Clostridia.Clostridiales.Clostridiaceae. <b>Clostridium_spec_</b>            | <b>CD</b> | -4.1691042 | 0.002093   |
| Bacteria.Firmicutes.Clostridia.Clostridiales.Ruminococcaceae. <b>Ruminococcus_spec_</b>          | <b>CD</b> | -4.1826426 | 0.002093   |
| Bacteria.Bacteroidetes.Bacteroidia.Bacteroidales.Bacteroidaceae. <b>Bacteroides_acidifaciens</b> | <b>CD</b> | -4.2055195 | 0.00394775 |
| Bacteria.Firmicutes.Bacilli.Lactobacillales.Lactobacillaceae. <b>Lactobacillus</b>               | <b>CD</b> | -4.6445094 | 0.00476268 |
| Bacteria.Firmicutes.Bacilli.Lactobacillales. <b>Lactobacillaceae</b>                             | <b>CD</b> | -4.6485962 | 0.01630917 |
| Bacteria. <b>Proteobacteria</b>                                                                  | <b>CD</b> | -5.0615875 | 0.03737299 |
| Bacteria.Proteobacteria. <b>Betaproteobacteria</b>                                               | <b>CD</b> | -5.0869826 | 0.01630917 |
| Bacteria.Proteobacteria.Betaproteobacteria. <b>Burkholderiales</b>                               | <b>CD</b> | -5.0869826 | 0.01630917 |
| Bacteria.Proteobacteria.Betaproteobacteria.Burkholderiales. <b>Alcaligenaceae</b>                | <b>CD</b> | -5.0869826 | 0.01630917 |
| Bacteria.Proteobacteria.Betaproteobacteria.Burkholderiales.Alcaligenaceae.Sutterella_spec_       | <b>CD</b> | -5.0869826 | 0.01630917 |

**Supplementary Table 1.** Differences in microbial taxa between HFD and CD mice, as shown in **Figure 1B**.
