# Supplementary material for: The Microbiota Promotes Arterial Thrombosis in Low-Density Lipoprotein Receptor-Deficient Mice
Source: PubMed Central journal article supplement (PMC6805995; doi:10.1128/mbio.02298-19), 2019-10-22
Supplement: mBio.02298-19-st002.pdf [file mBio.02298-19-st002.pdf]

| Mouse | Diet | CONV-R vs GF | Sex | Area carotid plaque ( $\mu\text{m}^2$ ) | % carotid plaque |
|-------|------|--------------|-----|-----------------------------------------|------------------|
| 1     | HFD  | CONV-R       | m   | 923861.1                                | 86.25            |
| 2     | HFD  | CONV-R       | m   | 545789.3                                | 76.22            |
| 3     | HFD  | CONV-R       | m   | 723086.15                               | 94.33            |
| 4     | HFD  | CONV-R       | m   | 441455                                  | 79.72            |
| 5     | HFD  | CONV-R       | m   | 506881.2                                | 65.01            |
| 6     | HFD  | CONV-R       | m   | 47184.4                                 | 10.52            |
| 7     | HFD  | CONV-R       | m   | 443334.85                               | 70.37            |
| 8     | HFD  | CONV-R       | f   | 98754.6                                 | 34.13            |
| 9     | HFD  | CONV-R       | f   | 567471.1                                | 70.58            |
| 10    | HFD  | CONV-R       | f   | 346924.3                                | 64.62            |
| 11    | HFD  | CONV-R       | f   | 427869.7                                | 74.16            |
| 12    | HFD  | CONV-R       | f   | -                                       | -                |
| 13    | HFD  | CONV-R       | f   | 223247.75                               | 40.31            |
| 14    | HFD  | CONV-R       | f   | 293033.2                                | 42.43            |
| 15    | HFD  | CONV-R       | f   | 356851.8                                | 51.65            |
| 16    | HFD  | GF           | m   | -                                       | -                |
| 17    | HFD  | GF           | m   | 60287.2                                 | 13.13            |
| 18    | HFD  | GF           | m   | 22826.9                                 | 7.3              |
| 19    | HFD  | GF           | m   | 197080.05                               | 38.92            |
| 20    | HFD  | GF           | m   | 182789.4                                | 50.11            |
| 21    | HFD  | GF           | f   | 293556.6                                | 51.97            |
| 22    | HFD  | GF           | f   | 183557.65                               | 52.3             |
| 23    | HFD  | GF           | f   | 170469.45                               | 52.54            |
| 24    | HFD  | GF           | f   | 521304.45                               | 84.5             |
| 25    | HFD  | GF           | f   | 199373.2                                | 52.79            |
| 26    | HFD  | GF           | f   | 177137.4                                | 49.23            |
| 27    | HFD  | GF           | f   | 483968.65                               | 72.44            |
| 28    | HFD  | GF           | f   | -                                       | -                |
| 29    | HFD  | GF           | f   | 206849.05                               | 37.53            |
| 30    | HFD  | GF           | f   | 259470.2                                | 35.84            |
| 31    | HFD  | GF           | f   | -                                       | -                |
| 32    | HFD  | GF           | m   | 582817.6                                | 65.48            |
| 33    | HFD  | GF           | m   | 110232.9                                | 17.86            |
| 34    | HFD  | GF           | f   | 196880                                  | 24.46            |
| 35    | HFD  | GF           | f   | 247345.1                                | 38.96            |
| 36    | HFD  | GF           | f   | 485075.4                                | 46.04            |
| 37    | HFD  | CONV-R       | f   | 75126.8                                 | 12.35            |
| 38    | HFD  | CONV-R       | f   | 246914.1                                | 23.1             |
| 39    | HFD  | CONV-R       | f   | 634793.8                                | 50.87            |
| 40    | HFD  | CONV-R       | f   | 98119.3                                 | 16.33            |

**Supplementary Table 2.** Absolute and relative values for atherosclerotic plaque area at the carotid artery of the 40 CONV-R (in grey) and GF (in white) animals fed with HFD. Animals are color-coded as in **Figure 2 (C-E)**: males are listed in blue, while females in red.
